1 **Experiences of family caregivers in caring for patients with heart failure at Jakaya**

2 **Kikwete Cardiac Institute, Dar es Salaam, Tanzania: a qualitative study**

3  
4 Tunzo L. Mcharo<sup>1,4\*</sup>, Masunga K. Iseselo<sup>2</sup>, Samwel E. Kahema<sup>3</sup>, Edith AM. Tarimo<sup>4</sup>

5 <sup>1</sup> Department of Nursing, Jakaya Kikwete Cardiac Institute, Dar es Salaam, Tanzania

6 <sup>2</sup> Department of Clinical Nursing, Muhimbili University of Health and Allied Sciences, Dar es  
7 Salaam, Tanzania

8 <sup>3</sup> Department of Medical Laboratory, Morogoro College of Health and Allied Sciences,  
9 Morogoro, Tanzania

10 <sup>4</sup> Department of Nursing Management, Muhimbili University of Health and Allied Sciences. Dar  
11 es Salaam, Tanzania

12 \* Corresponding author

13  
14 **Abstract**

15 **Background:** Heart failure (HF) continues to be a global health problem with its ramifications  
16 more pronounced in underdeveloped countries. Family members play a pivotal part in patient  
17 management which may influence the patient's overall quality of life. Prolonged delay in  
18 attendance to health care facilities among patients indicates ineffective support from family  
19 caregivers. In the Tanzanian context, there is limited information about the experiences of family  
20 caregivers in caring for patients with HF. This study explored family caregivers' experiences in  
21 caring for HF patients.

22 **Methods:** A qualitative descriptive study design was conducted at Jakaya Kikwete Cardiac  
23 Institute in Dar es Salaam, Tanzania. A purposive sampling technique was used to select the

24 potential participants. A sample size of 10 family caregivers of patients with HF was included in  
25 the study. Thematic analysis was used to derive the main theme and sub-themes.

26 **Results:** Three major themes were identified: demands for supportive care, new caring role and  
27 lifestyle, and professional support in caring for patients with HF. Caregivers needed social and  
28 financial support to facilitate the caring process. Learning to provide the required care at the right  
29 time was the new role acquired by caregivers while failing to participate in social events and  
30 caregiving in an unfavourable environment were reported as challenges in caregiving. However,  
31 compliance with instruction and effective interaction among the nurses and caregivers were  
32 considered to be positive professional support.

33 **Conclusion:** Caregivers need social and financial support to provide effective care to their  
34 patients. Caregiving is a learning process that needs continuous educational support to adapt to  
35 the new caring roles and challenges. Nurses should conduct regular assessments to explore  
36 caregivers' needs, challenges, and concerns and provide timely counselling that can facilitate  
37 coping.

38 **Keywords:** Caregiver, family caregiver, heart failure

39

## 40 **Introduction**

41 Heart failure (HF) is a complex clinical illness which is brought on by a structural or functional  
42 impairment of ventricular filling or blood ejection. (1). Heart failure is a widespread problem  
43 that has serious consequences for public health. According to a Global Health Data Exchange  
44 (GHXx) report, the current global prevalence of HF is 64.34 million cases (8.52 per 1,000  
45 inhabitants) (2). In the United States of America, HF affects 6 million adults (3,4). In the United  
46 Kingdom (UK) HF affects 900,000 annually, is predominantly a disease of older people and  
47 affects at least 5% of those aged 75 years old rising to 15% in very old people (5).

48 In Sub-Saharan Africa (SSA) HF is linked to high rates of recurrent hospitalization, morbidity  
49 and mortality, poor quality of life, and lost economic productivity (6). The majority of young and  
50 prosperous adults are affected with HF (6,7) with 75% of cases in 2005 being non-ischemic (7).  
51 Heart diseases, including HF, are common in Tanzania (8). Contrary to developed nations where  
52 ischemic heart disease predominates, Tanzania's leading contributor to HF is hypertension (8).  
53 This emphasizes the importance of early detection and treatment of hypertension. Anaemia, atrial  
54 fibrillation, and a lack of education are modifiable predictors of mortality (8).  
55 Family and friends participate in the management of patients with HF (4). Patients with HF  
56 usually depend on family members to carry out everyday tasks and manage their treatment  
57 process due to their poor physical and cognitive health (4,9). To maintain patients' adherence and  
58 self-care behaviour, family caregivers play a crucial role in community-based HF management,  
59 which requires a significant time and energy investment (10).  
60 Families are anticipated to play a bigger part in the healthcare system (11). Patients with HF rely  
61 on family caregivers for help with self-care behaviours and day-to-day monitoring of health  
62 status. The prolonged delay in attendance to healthcare facilities among patients indicates  
63 ineffective support from family caregivers (12). Although progress has been made in studying  
64 and documenting the experiences of family caregivers in caring for patients with HF (10), up to  
65 date, there is limited information on the experiences of the family caregiver in caring for patients  
66 with HF in the Tanzania context. High-quality care for HF patients includes effective support  
67 from family caregivers (13).

## 68 **Materials and Methods**

### 69 **Study Setting**

70 The study was conducted at Jakaya Kikwete Cardiac Institute (JKCI) in Dar es Salaam,  
71 Tanzania. JKCI is a nationally recognized teaching hospital with a focus on cardiovascular  
72 treatment, education, and research. The Institute can accommodate 120 patients, and on average,  
73 there are 700 outpatients and 100 inpatients each week with different heart conditions including  
74 HF (14). This facilitated easy access to the study participants.

### 75 **Design**

76 The study employed a qualitative descriptive design to explore the experiences of family  
77 caregivers. This kind of research design is mostly used in investigating a problem that has not  
78 been clearly defined (15). It was also important to use this design to obtain information useful in  
79 designing others studies. Also, it is important to note that, the design was selected to enhance  
80 interaction between the researcher and family caregivers. This interaction helped the researcher  
81 to learn from the caregivers' perspectives.

### 82 **Study participants**

83 The participants of this study were family caregivers of patients with HF. In this context, any  
84 family member, spouse, friend, or neighbour who had a close personal bond with patients with  
85 HF and offered a wide range of support was referred to as a family caregiver. Family caregivers  
86 who had been staying with the patient for 14 days and above, able to understand and speak  
87 Swahili were included in the study. Family caregivers who were stressed or mentally disturbed  
88 during the time of the interview were excluded because they could not provide adequate  
89 information as most of the time they thought about their patients.

90

## 91 **Sampling methods and procedure**

92 A purposive sampling method was used to obtain the study participants. In this technique,  
93 participants with rich information about caring for their patients were selected to participate. This  
94 process suited the purpose of the study as proposed by Etikan et al, (16). The participants were  
95 approached during patients' visiting hours and requested to make an appointment for the data  
96 collection at their convenient time and place. The wards in charge, who was conversant with  
97 participants' eligibility criteria were asked to identify potential participants. A sample of 10  
98 participants was considered sufficient because additional participants could lead to the  
99 accumulation of unnecessary information (17). The sample size was considered to be sufficient  
100 in providing information that helped in meeting the objectives of the study while at the same  
101 time ensuring the timely accomplishment of the study.

## 102 **Data collection**

103 Data were collected using in-depth interviews. This method provides a deep understanding of a  
104 subject under study (18). The data collection took place from April to May 2022. Before data  
105 collection, the first author developed an interview guide in response to specific objectives. The  
106 guide helped to capture the reality and nature of the research question being studied. The  
107 questions were developed from reviewed literature although other questions were raised during  
108 the interview as probing questions. The probing questions were prepared to deepen the  
109 understanding of the information which caregivers provided. The question in the interview guide  
110 includes, what are your needs as a caregiver of a patient with HF? What challenges do you face  
111 in caring for your patient with HF? And what support do you get from nurses when it comes to  
112 caring for patients with HF? The use of probes helped to get more clarification upon what the

113 participants said and it allowed flexibility and room for extra questions which were not reflected  
114 in the guide but still focused on the same topic.

115 The interview took place at the hospital premises in the small room that the first author booked  
116 for the interview. The room was big enough allowing participants free expression and good  
117 sitting arrangement. It was also well-ventilated and had good lighting to allow us to observe  
118 nonverbal expressions. Furthermore, the room is situated away from the wards and OPD and  
119 thereby providing a quiet and calm environment for the interview process. The first author  
120 conducted all the interviews. Data were collected using a digital voice recorder and all  
121 participants accepted to be recorded. Data collection continued until information saturation was  
122 obtained. The interview questions were modified slightly based on new emerging information  
123 from the participants. The duration of the interview was between 30 to 45 minutes, and the  
124 interviews were conducted in Swahili language

125

## 126 **Data analysis**

127 The analysis of data started just after the first interview. Before analysis, all the recorded  
128 information was transcribed verbatim to keep the original meaning of the information. (19) The  
129 first author and the research assistant transcribed the interviews. The transcribed information  
130 was also checked for consistency from the audio data. A few omissions of information and typos  
131 were corrected accordingly. The authors read and re-read the field notes and transcribed data  
132 until they had a firm grasp of the data gathered. To-and-back translation of transcripts from  
133 Swahili to English as proposed by Braun and Clarke (20) was done to ensure that no information  
134 is lost during the process (21).

135

136 The thematic analysis approach was employed during data analysis as guided by Braun and  
137 Clarke, 2006. This analytical approach was used because we wanted to find out about views,  
138 opinions and experiences from the perspectives of family caregivers (20). In this analysis, the  
139 first author coded the data manually. This was chosen because the sample size was small and  
140 therefore manageable in the available time. The generation of initial codes involved data  
141 reduction by the creation of categories that represented the meanings existing in the data  
142 segments. Initial codes were produced through terminologies participants used during the  
143 interview and used as a reference point for their experiences during the interview. These codes  
144 facilitated the researcher's ability to locate pieces of data later in the process. Concepts were  
145 developed by observing pertinent phenomena in the context of the study's goals. By  
146 incorporating, eliminating, merging, or splitting potential codes, we improved codes.

147  
148 Searching for themes began when all data were initially coded and collated, and a list of different  
149 codes was identified across the data set. We used tables to write and name each code and a brief  
150 description on a separate piece of paper and played around with organizing them into themes.  
151 Individual themes were compared to ensure that they are mutually exclusive from each other.  
152 We reviewed and refined the developed themes. In this aspect, we read all the collated extracts  
153 for each theme and considered whether they appear to form a coherent pattern. This involved  
154 ensuring the validity of individual themes to the data set, but also assessing whether the  
155 candidate theme accurately reflected the meanings in the data set as a whole or not. We then  
156 defined and named the themes and subthemes (**Table 1**).

157 **Table 1: Example of the coding process**

| Codes | Subtheme | Themes |
|-------|----------|--------|
|-------|----------|--------|

|                                                                                                                                                                                                                          |                                              |                                                 |
|--------------------------------------------------------------------------------------------------------------------------------------------------------------------------------------------------------------------------|----------------------------------------------|-------------------------------------------------|
| <p>Increased patients' social needs</p> <p>Increased patients' physical dependence</p> <p>Lack of money</p> <p>Caregivers' limited time to do business activities</p> <p>Caregivers' inability to pay hospital bills</p> | <p>Failure to meet caregiving needs</p>      | <p>New caring role and lifestyle challenges</p> |
| <p>Immobile patient</p> <p>Unstable patient condition</p> <p>Suffering to lift a heavy patient</p> <p>Staying with a patient all days</p> <p>Attention demand due to disease condition</p>                               | <p>Caring for the critically ill patient</p> |                                                 |

158

159 **Ethical Considerations.**

160 The Research Ethics Committee of Muhimbili University of Health and Allied Sciences  
 161 (MUHAS) approved the study with Ref. No MUHAS-REC-03-2022-1057. The permission to  
 162 collect the data was obtained from the head of research, training, and consultancy of JKCI with  
 163 Ref. No. AB123/307/01G/50. A signed, written informed consent was obtained from every  
 164 participant before enrolling in the study. The significance of the study was explained to  
 165 participants, who were then requested to give informed consent and engaged willingly in the  
 166 study. Participants were informed of the right to leave the study at any time whenever they  
 167 wished to. Additionally, participants were informed that there would be no consequences for  
 168 choosing to withdraw or decline to participate.



169

## 170 **Findings**

### 171 **Socio-demographic characteristics of participants**

172 Ten participants were included in this study. Six of the participants were females, while four  
173 were males. Those under 40 years old accounted for 5 and the rest were above 40 years old. Four  
174 participants were single, five were married, and one was a widow. Participants' educational  
175 levels were as follows: five had primary education, three had secondary education, and two had  
176 higher education (college education). Three participants were employed, five were self-  
177 employed, and two were unemployed.

178

### 179 **Themes and subthemes**

180 Three themes emerged in this study namely; high demand for caring support, new caring role and  
181 lifestyle challenges, and professional support (**Table 1**)

182 **Table 1:** Themes and sub-themes

| <b>Theme</b>                             | <b>Sub-theme</b>                                        |
|------------------------------------------|---------------------------------------------------------|
| Demands for supportive care              | The need for social support                             |
|                                          | The need for financial support                          |
| New caring role and lifestyle challenges | Learning to provide the required care at the right time |
|                                          | Failing to participate in social events                 |
|                                          | Caring in an unfavourable environment                   |
| Professional support                     | Compliance with professional instruction                |
|                                          | Effective nurse-caregiver interaction                   |

183

184 **Demand for supportive care**

185 Family caregivers reported that caring for patients with HF require their time and financial  
186 stability as patient demand a lot of things. This theme is explained under two sub-themes; the  
187 need for social support and the need for financial support.

188 ***The need for social support***

189 Participants reported requiring help to ease their caring responsibilities. They expressed that they  
190 need assistance from friends and family members to facilitate a caring role. They also added that  
191 feeling lonely while caring for their patients was one of the obstacles to providing effective care  
192 to their patients as stated below by one of the participants:

193 *“I need someone to help me to take care of the patient. For now, there is no one to help me in  
194 this task. I wish there was someone to help me”* (Male participant).

195 Also, participants explained that they needed someone to help them to get capital so that they  
196 could do small businesses to sustain their lives and caring responsibilities. One of the  
197 participants said:

198 *“For now I need capital so that I can do small businesses to sustain my life. I can do the light  
199 jobs like cooking samosa and mandazi, at least I can improve my life.”* (Female participant).

200 ***The need for financial support***

201 A participant expressed facing financial difficulties that make them fail to meet the daily needs  
202 that facilitate caring roles. Financial difficulties were reported as a challenge as they needed  
203 money to cover various bills and life needs. One of the participants revealed that:

204 *“For me, I'll say the challenge I get is money issues! If you don't have the money you won't be  
205 able to pay for a bed, when you get to the hospital, you pay there. I came here a month ago, and*

206 *I stayed for many days, I got the bill, and I knew it was for the bed and the medical costs, I told*  
207 *him I don't have the money.”* (Female participant).

208 Again, participants expressed that a lack of money was an obstacle in taking patients to regular  
209 clinics for checkups and they sometimes had to postpone until they could get money, which  
210 could take time. They did not have any money to pay for transport to the hospital as one of the  
211 participants described:

212 *“The challenge is that it can reach the day of clinic and you don't have any money in your*  
213 *pockets, and the patient is so sick that she cannot walk on foot, so you have to delay going to the*  
214 *clinic.”* (Female participant).

215

## 216 **New caring role and lifestyle challenges**

217 New caring roles emerged because their patients needed continuous support. In this case, the  
218 participants had to re-adjust their lifestyle and responsibilities of daily living. This posed  
219 challenges in fulfilling the two roles and responsibilities at the same time. Hence, failing to  
220 provide the required care to their patients at the right time. They also expressed failing to  
221 participate in social events and caring in an unfavourable environment

## 222 ***Learning to provide the required care at the right time***

223 Participants asserted that their patients were dependent and that they required assistance to meet  
224 their daily needs. However, they expressed that the caring tasks were difficult when the patient  
225 becomes obese making it a challenge to manage the patient alone. One participant said:

226 *“A patient with a heart condition sometimes requires you to lift him so that he can move or do*  
227 *something, and my patient has become heavy making it difficult for me to lift him alone, and I am*  
228 *worried my health could be at risk too”* (Female participant).

229 Also, participants stated that patients with HF require ongoing care from them (caregivers). They  
230 added that patients required constant attention because their conditions could change at any time  
231 and become worse. This made them (caregivers) worried that they could lose their beloved ones  
232 at any time. One of the participants reported that:

233 *“The patient may experience difficulty in breathing, sometimes feel palpitation. This condition*  
234 *disturbs me, and you know I don’t have equipment that can help the patient to breathe.”* (Female  
235 participant)

236

### 237 ***Failing to participate in social events***

238 Participants described that participation and engagement in their community activities had  
239 decreased. They reported that their relationships with their communities have been strained as a  
240 result of their responsibilities to their patients. They determined that they do not have time to  
241 leave their patients alone. One of the participants stated:

242 *“I don't get time to participate. We had a patient at certain hospital, he died and was buried in*  
243 *my region but I could not attend the burrial because of my patient's condition. He is a man you*  
244 *cannot leave for a minute; I am with him all the time.”* (Male participant).

245 Also, participants reported that due to their caring role it was difficult for them to attend social  
246 events such as ceremony because their patient needed them all the time. One of the participants  
247 said:

248 *“It is not easy for sure. I cannot leave my patient. That I should leave the hospital to attend a*  
249 *wedding ceremony? I cannot go anywhere; I am just here with my patient”* (Female participant).

250

251 ***Caring in an unfavourable environment***

252 Participants expressed being subjected to a risky and infectious environment when caring for  
253 their patients. They explained that there was no toilet specific for caregivers that necessitated  
254 them to use the same toilet with the patients. From their perspectives, this phenomenon was  
255 putting them at risk of contracting various diseases as stated by the participant below:

256 *“That is, we [caregivers] who are here are very vulnerable to our health because even the toilets*  
257 *for caregivers are not there. I recently felt my body was weak and every body part was aching.”*

258 (Male participant).

259 Aside from the unfavourable environment in the hospital toilets, participants noted that there was  
260 no official place for caregivers to sleep at night. This caused them to sleep while seated on chairs  
261 or the floor, or not sleep at all during the night. This made them feel ill because they felt  
262 exhausted and experienced generalized body pains. One participant elaborated:

263 *“At the hospital, there is no official place to sleep, as caregivers, we find it difficult to sleep, and*  
264 *we sit on chairs like this and take a nap. There is no place for you to say you would lie down for*  
265 *a while.”* (Male participant).

266

267 **Professional support**

268 In the caring role, the family caregiver needs support from a health care professional as handling  
269 patients with HF needs skills and knowledge on what to do to improve the patient quality of life.

270 Caregivers reported that compliance with professional instruction and effective nurse-caregiver  
271 interaction is an outcomes of good support from professionals.

272 ***Compliance with professional instruction***

273 Participants stated that information provided by nurses and other health care providers in the  
274 hospital was useful for their patients and for them to improve the care that they delivered. They  
275 explained that they were told how to feed their patients, give medication to their patients in an  
276 emergency before they arrive at the hospital, and how to perform simple physical exercises. One  
277 participant expressed that:

278 *“They tell you the dos and don’ts. If the patient has defecated wear gloves. For example, my*  
279 *patient refused to eat for about five days, they inserted a nasogastric tube into the patient and*  
280 *they directed me on how to feed her, they would feed her three times a day, I learned how to do it*  
281 *but they still kept coming to feed her. For they can get an emergency, I learned and so far I can*  
282 *feed her myself.”* (Female participant)

283 The participants also stated that they had received medical advice from nurses regarding dietary  
284 and lifestyle modifications, maintaining follow-up appointments, and completing prescription  
285 treatments as directed. This was important for the betterment of the patients as in the following  
286 participant’s expression:

287 *“Instructions you can probably be told to insist on him what the patient should eat, monitor the*  
288 *food he is assigned to eat, treatment and medication compliance. That is the instructions we are*  
289 *given, including how to exercise.”* (Female participant).

290 Moreover, participants appreciated the information provided by nurses and stated that the  
291 information not only was beneficial to the patients but also to them (caregivers). One participant  
292 revealed that:

293 *“They come telling you this patient should not be given something; this patient is not this and*  
294 *that. Therefore, they give you a lot of things that help you as a caregiver, and I’m directed to use*  
295 *medication that helps my patient.”* (Female participant)

296

### 297 ***Effective nurse-caregiver interaction***

298 Participants reported enjoying the qualities of nursing care at the JKCI. They mentioned that  
299 nurses were so collaborative that they responded quickly whenever they were called for help  
300 which gave them hope and confidence whenever they needed help. One participant expressed  
301 that:

302 *“I have stayed at the hospital for long time. I am grateful for this hospital; they have given me a*  
303 *lot of support. The patient was in a bad condition, but now he is at least okay. Without them, we*  
304 *could have not reached this day.”* (Female participant)

305

306 Also, nurses came together and formed a team to solve patient care and other health-related  
307 issues to improve patient care quality. Nurses taught caregivers psychology to improve patient  
308 health outcomes through good communication and daily relationship building. At the same time,  
309 participants appreciated the collaboration from nurses and one of the participants expressed that:

310 *“You tell them this, they listen to you and take care of your patient well; you wish they could*  
311 *continue the service. And we keep in touch. They don’t help me economically, but emotionally*  
312 *and psychologically it helps because you have confidence what my patient is given, gets cured.”*

313 (Female participant).

314

315 **Discussion**

316 This study explored the experience of family caregivers for patients with HF. It is revealed that  
317 caregivers needed social and financial support to facilitate the caring process. Learning to  
318 provide the required care at the right time was the new role acquired by caregivers. Failing to  
319 participate in social events and caregiving in an unfavourable environment were reported as  
320 challenges in caregiving. However, compliance with instruction and effective interaction among  
321 the nurses and caregivers were considered to be positive professional support.

322  
323 Support from family and friends in caring for patients with heart failure is a common social  
324 phenomenon as it brings relief to the caregivers and a feeling of well-being(11). In our findings,  
325 the lack of social and financial support from family members and friends indicates that the  
326 support system in our family is decreasing. This can be viewed in terms of the transition from  
327 extended family to nuclear family whereby little or no social support is provided (22) These  
328 findings are consistent with the findings of Chi et al, who found it difficult to balance caregiving  
329 with other responsibilities and find time to manage their quality of life (23). Also, the findings in  
330 this study are consistent with the study by Dionne-Odom et al who reported that caregivers had  
331 low familial social support (24). However, there are other factors such as relationship patterns  
332 among caregivers, patients and other family members as well as poverty among family members  
333 that need further exploration to arrive at a solid conclusion.

334  
335 Caregivers of HF patients who participated in this study needed help from friends and families in  
336 their caregiving role. Caring for patients with HF was a difficult task that needs devotion to  
337 undertake and most of the time the ones who are passionate to help, get involved in caring for



338 patients with HF. Caregivers of patients with HF needed to engage in various social activities but  
339 couldn't find the time because they spent most of their time with their patients. This discovery  
340 supports earlier findings in Nigeria and Ghana, where the caregiving role affected caregivers'  
341 social engagement (25,26). Doherty et al and Wingham et al reported similar findings (27,28).  
342 According to this study, caregivers of HF patients demand financial stability. They are required  
343 to pay hospital bills and buy medicines prescribed to their patients. They failed to do so and this  
344 caused inadequate patient care. According to this study, a lack of money caused clinic visits to be  
345 delayed or even missed entirely. The findings in this study relate to a study which was done in  
346 China that reported that lack of money contributed to inadequate care for patients with HF (29).  
347 Likewise, a study by Grants and Graven in England revealed a lack of financial well-being was  
348 among the challenges faced by caregivers (30). And a study in Zambia by Musonda, et al  
349 reported a lack of supporting resources being among the challenges faced by caregivers (31). The  
350 result is similar as both studies used a non-informal caregiver of a patient with HF and data were  
351 collected using a cross-sectional study design and qualitative study design where data was  
352 obtained once so it was easy for family caregivers to verbalize their challenges. Therefore, there  
353 is a need for providing adequate support to the family caregiver by identifying and evaluating  
354 their needs so that appropriate intervention could be designed to support caregivers and consider  
355 an urgent priority.

356 Also in this study, participants reported learning to provide required care at the right time. An HF  
357 patient's condition can change anytime and a patient may experience difficulty in breathing and  
358 palpitations. In this case, a family caregiver may not know what to do to save the lives of their  
359 beloved ones. This made caregivers not leave as their patients' condition could change at any  
360 time and their assistance could be of great help. These findings are consistent with a study by

361 Kim and colleagues in Korea which reported similar findings (10). Again, caregivers reported  
362 that it was difficult to estimate how long the situation could last, fearing that patient could die.  
363 These findings are similar to the study by Tang in China who reported that caring for somebody  
364 with a chronic illness makes caregivers worry and fear that the patient is near death and could die  
365 at any time (32).

366 Furthermore, in this study, an unfavourable caring environment while patients are in the hospital  
367 has been reported. This may be explained by the fact that social services in the hospital are not  
368 adequate. The lack of a formal place for caregivers to rest and sleep at night while they are in the  
369 hospital was a distressing phenomenon. Although sharing toilets with patients was considered to  
370 jeopardize their health status, there are no other means to extend these services for caregivers.  
371 Other studies have reported similar findings. For example, Chukwu and colleagues' study in  
372 Nigeria found infrastructure and amenity deficiencies (25), while in Uganda, inadequate  
373 accommodation, sanitation, and the lack of running water were reported as challenges faced by  
374 caregivers at the hospital (33).

375  
376 In this study, support to the family caregivers of patients with HF was important as caregivers  
377 reported to have compliance with professional instruction which helped them in caring for their  
378 patients with HF. The findings in this study are consistent with the study in the United Kingdom  
379 that reported support to caregivers was provided with useful information from nurses. (28).  
380 However, the findings of our study differ from studies done in Nigeria and Iran where  
381 caregivers reported receiving inadequate support and little guidance from healthcare workers in  
382 their caregiving roles (9,25). Another study done in Norway reported that caregivers of patients  
383 with HF received insufficient information at the time of discharge from healthcare providers

384 which made caregivers and their patients live unhealthy life and led to multiple readmission (11).  
385 The findings in this study might be used to develop strategies and policies which can be used to  
386 address the challenges caregivers face when caring for their patients including providing nurses  
387 with education which will enhance them to provide sufficient information to caregivers to  
388 improve the well-being of the patient and their caregivers.

### 389 **Limitations**

390 Caregivers interviewed were those who only managed to come to the hospital for treatment, and  
391 those who were home researchers did not manage to explore their experience, so the experience  
392 was not broadly explored, therefore, further studies have to be carried out to explore the  
393 experience of family caregivers especially those who are at home.

394 There was a chance that the participant's original meaning would not be preserved in the Swahili-  
395 to-English translation of the transcript. The researcher employed language specialists who are  
396 conversant in both Swahili and English to lessen this prejudice. The transcripts of the audiotapes  
397 were translated into English and compared to the Swahili transcript for verification.

### 398 **Conclusion**

399 The goal of this study was to explore the experiences of the family caregivers of HF patients.  
400 Caregivers need social and financial support to provide effective care to their patients.  
401 Caregiving is a learning process that needs continuous educational support to adapt to the new  
402 caring roles and challenges. Nurses should conduct regular assessments to explore caregivers'  
403 needs, challenges, and concerns and provide timely counselling that can facilitate coping.

404 **Acknowledgement**

405 Special thanks to my study participants; I am delighted for their cooperation, and hospitality, and  
406 for providing valuable information on their experiences in caring for patients with HF during my  
407 research., Nurse in charge in each unit at JKCI for helping in process of getting the correct  
408 participants who suit the purpose of study, and my institution; Jakaya Kikwete Cardiac institute  
409 for their support, May God bless you abundantly

410

411

412

413

414

415

416

417

418 **References**

- 419 1. Bozkurt B, Coats AJS, Tsutsui H, Abdelhamid CM, Adamopoulos S, Albert N, et al.  
420 Universal definition and classification of heart failure: a report of the Heart Failure  
421 Society of America, Heart Failure Association of the European Society of Cardiology,  
422 Japanese Heart Failure Society and Writing Committee of the Universal Definition o. Eur  
423 J Heart Fail. 2021;23(3):352–80.
- 424 2. Lippi G, Sanchis-Gomar F. Global epidemiology and future trends of heart failure. AME  
425 Med J. 2020;5(Ci):15–15.
- 426 3. Savarese G, Lund LH. Epidemiology Global Public Health Burden of Heart Failure.

- 427 2017;7–11.
- 428 4. Kitko L, McIlvennan CK, Bidwell JT, Dionne-Odom JN, Dunlay SM, Lewis LM, et al.  
429 Family Caregiving for Individuals with Heart Failure: A Scientific Statement from the  
430 American Heart Association. *Circulation*. 2020;141(22):e864–78.
- 431 5. Connolly M, Beattie J, Walker D, Dancy M. End of life care in heart failure A framework  
432 for implementation. *NHC Improving Quality*; 2016. p. 1–28.
- 433 6. Agbor VN, Essouma M, Ntusi NAB, Nyaga UF, Bigna JJ, Noubiap JJ. Heart failure in  
434 sub-Saharan Africa: A contemporaneous systematic review and meta-analysis. *Int J*  
435 *Cardiol* [Internet]. 2018;257:207–15. Available from:  
436 <https://doi.org/10.1016/j.ijcard.2017.12.048>
- 437 7. Gallagher J, Mcdonald K, Ledwidge M, Watson CJ. Clinical Syndromes Heart Failure in  
438 Sub-Saharan Africa. 2018;21–4.
- 439 8. Makubi A, Hage C, Lwakatare J, Kisenge P, Makani J. Europe PMC Funders Group  
440 Contemporary aetiology , clinical characteristics and prognosis of adults with heart failure  
441 observed in a tertiary hospital in Tanzania□: the prospective Tanzania Heart Failure (   
442 TaHeF ) study. *Heart*. 2017;100(16):1235–41.
- 443 9. Etemadifar S, Bahrami M, Shahriari M, Farsani AK. Family caregivers’ experiences of  
444 caring for patients with heart failure: A descriptive, exploratory qualitative study. *J Nurs*  
445 *Res*. 2015;23(2):153–61.
- 446 10. Kim EY, Oh S, Son Y. Caring experiences of family caregivers of patients with heart  
447 failure□: A meta-ethnographic review of the past 10 years. *Eur J Cardiovasc Nurs*.  
448 2020;1–13.
- 449 11. Kirsti A, Strom A, Korneliussen K, Fagermoen MS. Family caregivers to a patient with

- 450 chronic heart failure living at home: co-workers in a blurred health care system. *Nor J*  
451 *Nurs.* 2016;11(2):158–65.
- 452 12. Hertz JT, Sakita FM, Kweka GL, Loring Z, Thielman NM, Temu G, et al. Healthcare-  
453 seeking behaviour, barriers to care and predictors of symptom improvement among  
454 patients with cardiovascular disease in northern Tanzania. *Int Health.* 2019;1–8.
- 455 13. Cleland JGF. Improving care for patients with acute heart failure: before, during and  
456 after hospitalization. 2015;(January):110–45.
- 457 14. JKCI. JKCI HOSPITAL OVERVIEW [Internet]. 2020 [cited 2021 Jul 23]. Available  
458 from: [/www.jkci.or.tz/about/category/hospital-overview](http://www.jkci.or.tz/about/category/hospital-overview)
- 459 15. Boru T. CHAPTER FIVE RESEARCH DESIGN AND METHODOLOGY 5.1.  
460 Introduction Citation: Lelissa TB (2018); *Research Methodology*; University of  
461 South Africa, PHD Thesis. 2018;(December).
- 462 16. Al, Etikan Ilker, Sulaiman a. Musa RSA. Comparison of Convenience Sampling and  
463 Purposive Sampling Comparison of Convenience Sampling and Purposive Sampling. *Am*  
464 *J Theor Appl Stat.* 2017;11(February).
- 465 17. Sim J, Saunders B, Waterfield J, Kingstone T. Can sample size in qualitative research be  
466 determined a priori? *Int J Soc Res Methodol* [Internet]. 2018;5579:1–16. Available  
467 from: <https://doi.org/10.1080/13645579.2018.1454643>
- 468 18. Showkat N, Parveen H. In-depth Interview Quadrant-I (e-Text). 2017;(July).
- 469 19. John Creswell JDC. No Title. Fifth edit. Helen Salmon, Chelsea Neve MH, editor. Los  
470 Angeles; 2018.
- 471 20. Braun V, Clarke V. Using thematic analysis in psychology. *Qual Res Psychol.* 2006;3:77–  
472 101.

- 473 21. Ho S, Holloway A, Stenhouse R. Analytic Methods ' Considerations for the Translation of  
474 Sensitive Qualitative Data From Mandarin Into English. *Int J Qual Methods*. 2019;18:1–6.
- 475 22. Lloyd-Jones DM, Larson MG, Leip EP, Beiser A, D'Agostino RB, Kannel WB, et al.  
476 Lifetime risk for developing congestive heart failure: The Framingham Heart Study. *Am*  
477 *Hear Assoc*. 2002;106(24):3068–72.
- 478 23. Chi NC, Demiris G, Pike KC, Washington K, Parker Oliver D. Exploring the Challenges  
479 that Family Caregivers Faced When Caring for Hospice Patients with Heart Failure. *J Soc*  
480 *Work End-of-Life Palliat Care* [Internet]. 2018; Available from:  
481 <https://doi.org/10.1080/15524256.2018.1461168>
- 482 24. Dionne-Odom JN, Hooker SA, Bekelman D, Mcghan G, Kitko L, Wells R, et al. Family  
483 Caregiving for Persons with Heart Failure at the Intersection of Heart Failure and  
484 Palliative Care: A State-of-the- Science Review. *Hear Fail Rev*. 2018;22(5):543–57.
- 485 25. Chukwu Ngozi, Agwu Prince, Ajibo Henry AN. Challenges faced by informal caregivers  
486 of patients in a Nigerian hospital and implications for social work. *J Soc Work*. 2022;1–  
487 18.
- 488 26. Agyemang-duah W, Mensah CM, Peprah P, Arthur F, Addai B, Abalo EM. Informal  
489 health care: examining the role of women and challenges faced as caregivers in rural and  
490 urban settings in Ghana. *J Public Heal*. 2018;(2003):1–7.
- 491 27. Doherty LC, Fitzsimons D, McIlfatrick SJ. Carers' needs in advanced heart failure: A  
492 systematic narrative review. *Eur J Cardiovasc Nurs*. 2016;15(4):203–12.
- 493 28. Wingham J, Frost J, Britten N, Jolly K, Greaves C, Abraham C, et al. Needs of caregivers  
494 in heart failure management: A qualitative study. *Chronic Illn*. 2015;11(4):304–19.
- 495 29. Hu X, Dolansky MA, Hu X, Zhang F, Qu M. Factors associated with the caregiver burden

- 496 among family caregivers of patients with heart failure in southwest China. *Nurs Heal Sci.*  
497 2016;18(1):105–12.
- 498 30. Grant JS, Graven LJ. Problems experienced by informal caregivers of individuals with  
499 heart failure: An integrative review. *Int J Nurs Stud* [Internet]. 2018;80:41–66. Available  
500 from: <http://dx.doi.org/10.1016/j.ijnurstu.2017.12.016>
- 501 31. Musonda KC, Nyashanu M, Mutale W, Sitali D, Mweemba O. Exploring The Challenges  
502 Faced by Informal Home Based Palliative ( HBP ) Caregivers in Ndola District ,  
503 Exploring The Challenges Faced by Informal Home. *J Soc Work End Life Palliat Care*  
504 [Internet]. 2021;17(4):349–63. Available from:  
505 <https://doi.org/10.1080/15524256.2021.1976351>
- 506 32. Tang Y. Caregiver burden and bereavement among family caregivers who lost terminally  
507 ill cancer patients. *Paliative Support Care.* 2018;1–8.
- 508 33. Sadigh M, Nawagi F, Sadigh M. The Economic and Social Impact of Informal Caregivers  
509 at Mulago National Referral Hospital ,. *Ann Glob Heal* [Internet]. 2016;82(5):866–74.  
510 Available from: <http://dx.doi.org/10.1016/j.aogh.2016.06.005>  
511  
512  
513  
514
